# Supplementary material
Source: MDPI journal article supplement (https://www.mdpi.com/2072-4292/15/12/3190)
Supplement: s1 [file s1 › remotesensing-2442776-SI.pdf]

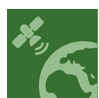

## Supplementary Materials

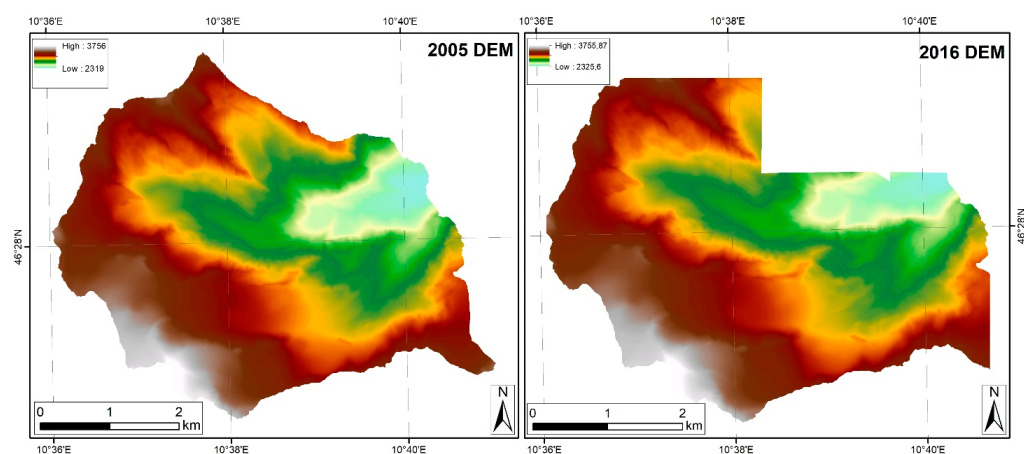

**Figure S1.** Digital elevation models (2005 and 2016) of the Martello valley used in the proglacial analysis. The 2016 data was produced for the Autonomous Province of Bolzano only for the glaci-erized areas, and for this reason, in the north-eastern part of the valley, the DEM is missing.
